## EFFECTS OF HYPOXIA AND DRUGS ON THE CARDIOVASCULAR DYNAMICS OF THE ATLANTIC HAGFISH *MYXINE GLUTINOSA*

By MICHAEL AXELSSON, ANTHONY P. FARRELL\*  
AND STEFAN NILSSON

*Department of Zoophysiology, University of Göteborg, Box 250 59,  
S-400 31 Göteborg, Sweden*

*Accepted 12 February 1990*

### Summary

Cardiac output, ventral and dorsal aortic blood pressure and heart rate were recorded simultaneously in unanaesthetized hagfish, *Myxine glutinosa* L. Mean cardiac output was  $8.7 \text{ ml min}^{-1} \text{ kg}^{-1}$  and mean heart rate  $22.3 \text{ beats min}^{-1}$ . The absence of beat-to-beat oscillations in heart rate was consistent with the lack of an extrinsic cardiac innervation in hagfish. Mean blood pressures were 1.04 kPa (ventral aorta) and 0.77 kPa (dorsal aorta).

Injection of adrenaline into the caudal vein significantly increased cardiac output, stroke volume, heart rate and blood pressures of both aortas. Peak cardiac output was close to  $25 \text{ ml min}^{-1} \text{ kg}^{-1}$ . Injection of the  $\beta$ -adrenoreceptor antagonist sotalol decreased resting heart rate significantly. We conclude that endogenous catecholamines from chromaffin cells of the heart are instrumental in the regulation of cardiac function in *Myxine*.

Injection of acetylcholine had little direct effect on the recorded cardiac variables, but caused marked branchial vasoconstriction. Heart rate increased as the pressor response subsided. The cholinergic antagonist atropine had no effect on any of the resting parameters.

Injection of adenosine had no direct cardiac effects but reduced the systemic vascular resistance.

Severe hypoxia ( $P_{\text{wO}_2} = 1.5\text{--}2.2 \text{ kPa}$  for 15–35 min) had very little effect on the cardiovascular variables recorded. The remarkable ability of the hagfish heart to maintain normal cardiac output during severe hypoxia is discussed with respect to the anaerobic pumping capacity of the heart.

Pump-perfused, *in situ* gill preparations were used to examine branchial vasoactivity. Acetylcholine and adrenaline produced dose-dependent vasoconstriction, whereas isoprenaline, noradrenaline and adenosine dilated the branchial vasculature.

\*Present address: Department of Biological Sciences, Simon Fraser University, Burnaby, BC, Canada V5A 1S6.

### Introduction

The cardiovascular system of the myxinoid cyclostomes shows certain differences from that in the other fish groups. As in other fish, the systemic heart in the myxinoids is coupled in series with the branchial and systemic vascular circuits. However, in addition to the performance of the systemic heart, blood flow is enhanced by pumping action elicited by the striated muscle of the branchial baskets and the caudal venous sinus ('caudal heart'; Johansen, 1963; Johansen and Strahan, 1963; Bloom *et al.* 1963; Laurent *et al.* 1983; Satchell, 1984). A unique feature of the myxinoid circulation is the presence of a portal vein heart ('cor venosum portale'), which is composed of cardiac muscle and beats with an intrinsic rhythm set by a pacemaker. The portal heart collects blood from the right anterior cardinal vein and the supra-intestinal (portal) vein, and passes it into the common portal vein which runs to the liver (Fänge *et al.* 1963a).

A further and unusual feature of the systemic and portal hearts of myxinoids is the storage of large quantities of catecholamines in specialized myocardial cells (Bloom *et al.* 1961, 1963; Euler and Fänge, 1961; Fänge *et al.* 1963a,b). With the exception of the lungfish *Protopterus* and *Lepidosiren* (Abrahamsson *et al.* 1979; Scheuermann, 1979; Scheuermann *et al.* 1981; Axelsson *et al.* 1989a), such catecholamine-containing cells are not found in vertebrate hearts [a possible exception are the granulated endothelial cells of some teleosts, which are thought to be able to store catecholamines (Sætersdal *et al.* 1974; Leknes, 1980)].

Reports on the cardiovascular physiology of myxinoids are scarce, and studies of how blood pressure and cardiac performance are controlled *in vivo* are practically absent. The available studies show a relatively low blood pressure in both the ventral and dorsal aortas (Satchell, 1986; Davie *et al.* 1987).

The myxinoid heart receives no extrinsic innervation, and the isolated systemic heart of *Myxine* is remarkably insensitive to pharmacological agents (Fänge *et al.* 1963b). Thus acetylcholine, catecholamines and tyramine, all known to exert strong effects on the heart in other vertebrate species, have little or no effect on the heart of *Myxine*. However, depletion of the catecholamine stores with reserpine causes bradycardia or cardiac arrest (Bloom *et al.* 1961), suggesting a tonic influence on cardiac performance by the endogenous catecholamine stores. In hearts from reserpine-treated animals, positive inotropic and chronotropic effects of catecholamines can be obtained (Fänge and Östlund, 1954; Östlund, 1954; Augustinsson *et al.* 1956; Bloom *et al.* 1961).

*Myxine glutinosa* inhabits mounds (hillocks) made of soft mud, and it is reasonable to believe that the interior of these mounds may sometimes be hypoxic (Foss, 1963). The aim of the present study was to provide basic information about blood pressures and cardiac output in *Myxine*, and to investigate the effects of hypoxia and autonomic drugs on the cardiovascular system of this species.

### Materials and methods

Female hagfish, *Myxine glutinosa*, with a body mass of 55–91 g and a body

length of 30–40 cm, were used in this study, which was performed during July. The hagfish were kept in well-aerated running sea water at 10–11°C, and were used within a week of capture.

### *Surgical and preparative procedure*

#### *In vivo experiments*

In this part of the study seven animals were used. The animals were anaesthetized in ice-cooled sea water and MS 222 (tricaine; 3-aminobenzoic acid ethylester methanesulphonate; 1–4 g l<sup>-1</sup>) for approximately 15 min. The animals were then transferred to a chilled rubber foam dam (0–5°C) on the operating table. During surgery there was a continuous irrigation of the gills with cold (8–12°C) sea water.

To measure cardiac output ( $\dot{Q}$ =ventral aortic blood flow), heart rate ( $f_H$ ) and ventral aortic (prebranchial) blood pressure ( $P_{VA}$ ), a midline incision was made just anterior to the common branchial and pharyngo-cutaneous aperture, and the anterior part of the heart exposed. The ventral aorta and the second afferent gill artery were carefully dissected free from the surrounding tissue, and a cannula (PE 25, drawn to a final tip size approximately corresponding to a PE 10) was occlusively implanted in the afferent artery of the second gill arch and advanced into the ventral aorta for recording of  $P_{VA}$ .

A cuff-type (1.3 mm) Doppler flow probe (single crystal, P. Pohl International Inc.) was placed around the ventral aorta, caudal to the first afferent gill artery for recording  $\dot{Q}$  and  $f_H$ . The leads from the flow probe and the cannula were tunnelled caudally and secured by skin sutures. The Doppler probes were attached to a Doppler flow meter (Iowa University).

For recording of the dorsal aortic blood pressure ( $P_{DA}$ ) and injection of different drugs, the dorsal aorta and caudal vein were exposed *via* an incision a few centimetres anterior to the tip of the tail. A cannula (PE 25) was occlusively inserted in the dorsal aorta and another cannula (PE 10) was inserted into the vein: both were secured *via* skin sutures posterior to the incision.

Cannulae were filled with 3.0% NaCl containing heparin (approx. 50 i.u. ml<sup>-1</sup>) and attached to Statham P23 pressure transducers. Calibration of both pressure transducers was made simultaneously against a static water column. Signals were suitably amplified and displayed on a Grass Polygraph recorder system model 7D.  $f_H$  was derived from the phasic blood flow signals *via* a Grass 7P44 tachograph, and expressed as beats min<sup>-1</sup>.  $\dot{Q}$  and stroke volume ( $V_S$ ) are expressed as ml min<sup>-1</sup> kg<sup>-1</sup> and ml beat<sup>-1</sup> kg<sup>-1</sup>, respectively.

After surgery, the hagfish was transferred to the experimental tube (25 mm in diameter and 470 mm long). A steady flow of well-aerated sea water (approx. 0.2 l min<sup>-1</sup>) at 10–11°C was fed through the tube, which was immersed in a larger tank connected to the sea-water system.

The hagfish was allowed to recover in the tube for at least 24 h before the start of

experiments, to let the effects of surgery and anaesthesia wear off and the cardiovascular parameters stabilize (see also Smith *et al.* 1985).

#### *Calibration of the Doppler flow probes*

After each experiment, the Doppler flow probe was calibrated *in situ* after securing an inflow cannula in the ventricle and an outflow cannula in the ventral aorta (near the exit of the fourth pair of gill arteries) and tying off the afferent gill arteries. Diluted, heparinized hagfish blood was used to calibrate the probe over a range of flows from the lowest mean flow value to the highest peak pulsatile value recorded for that animal. The data were then analyzed by linear regression analysis to provide calibration values.

#### *In vivo protocols*

##### *Control values*

Resting values for all parameters (see Table 1) were recorded after at least 24 h in the experimental chamber and before any experimentation.

##### *Drug injection experiments*

In these experiments the responses to different pharmacologically active agonists and antagonists were investigated. Injections were made through the caudal vein cannula in volumes of 0.1 ml, followed by 0.2 ml of 3.0% NaCl to flush the cannula.

Increased venous return is known to increase stroke volume and heart rate in hagfish (Reite, 1969). To investigate the possibility of volume effects, all drug injection experiments started with a sham injection of saline (0.3 ml). No less than 30–40 min was allowed between injections. Prior to each injection the cardiovascular variables were stable. The total volume of fluid injected into the animal over 8–9 h in these experiments was 1.5–2.0 ml.

Adrenaline and acetylcholine were injected at two different doses (10 or 100 nmol kg<sup>-1</sup>). The order of injection of these two drugs was varied between the different animals. Adenosine, a known vasoactive agent produced when the ATP pool is depleted, e.g. during hypoxia, was injected at a dose of 1 μmol kg<sup>-1</sup>. The β-adrenoreceptor antagonist sotalol was injected in steps starting with half the dose used for complete β-adrenoreceptor blockade in the Atlantic cod (*Gadus morhua*) (1.35 mg kg<sup>-1</sup>), and subsequent injections were made until no further change in heart rate was seen (total dose 2.7–4 mg kg<sup>-1</sup>). Atropine was injected at a dose of 1.2 mg kg<sup>-1</sup>.

##### *Chemicals used*

The following drugs were used: L-adrenaline bitartrate (Sigma), atropine sulphate (Sigma), adenosine free base (Sigma), acetylcholine chloride (Sigma), L-isoprenaline hydrochloride (Sigma), L-noradrenaline bitartrate (Sigma) and sotalol hydrochloride (Hässle AB). The drugs were dissolved in 3.0% NaCl or Ringer's solution.

### *Hypoxic exposure*

To investigate the response to hypoxia in *Myxine*, a tank (12 l) with sea water at the same temperature as in the main system was bubbled with nitrogen to a final oxygen tension of 1–1.6 kPa. Hypoxia was induced in the experimental chamber by switching to the hypoxic water supply. The oxygen tension was continuously measured in the front end of the chamber (a few centimetres in front of the head of the animal) with a Clark-type oxygen electrode (Radiometer) connected to a Radiometer system (PHM 73). The final oxygen tension in the tube was reached after 1–2 min and ranged from 1.5 to 2.2 kPa. Normoxia was restored after 15–35 min and the recovery of the animal was monitored for a further 20 min.

### *In situ gill perfusion*

Because the drug injections were likely to have vascular as well as cardiac effects, a perfused gill preparation was used to investigate gill vasoactivity. The hagfish ( $N=7$ ; mass 45–73 g) were killed by immersion in ice-cooled MS 222 solution for approximately 30 min, and decapitated. The animals were severed just anterior to the heart and the ventral aorta was cannulated (PE 90). Another cannula for collecting the perfusate and adjusting the outflow counter-pressure was inserted and secured in the dorsal aorta. The preparation was transferred to a thermostatically controlled (10–11 °C) organ bath, and the ventral aortic catheter connected to a pneumatically driven peristaltic perfusion pump providing a pulsatile constant flow (30 pulses  $\text{min}^{-1}$ ). Perfusion counter-pressure was recorded using a three-way stopcock, with one arm attached to a Statham pressure transducer model P23 connected to a Grass polygraph recorder system model 7D. The pressure transducer was calibrated against a static column of water and referenced to the fluid in the organ bath. The flow (approx. 6–9  $\text{ml min}^{-1} \text{kg}^{-1}$ ) and the inflow pressure (1.0–2.0 kPa) were in keeping with the *in vivo* measurements of these parameters. A *Myxine* Ringer's solution of the following composition was used ( $\text{g l}^{-1}$ ): NaCl, 27.7; KCl, 0.6;  $\text{CaCl}_2 \cdot 2\text{H}_2\text{O}$ , 0.73;  $\text{NaHCO}_3$ , 1.26;  $\text{NaH}_2\text{PO}_4$ , 0.08; glucose, 1.00 (Holmgren and Fänge, 1981). The solution was continuously bubbled with a mixture of 97%  $\text{O}_2$  and 3%  $\text{CO}_2$ . This solution has been shown to keep tissues from *Myxine* viable for at least several hours (Holmgren and Fänge, 1981).

Bolus injections of drugs (0.1 ml) were made through a side-arm in the perfusion line into the ventral aortic cannula. Sham injections of Ringer's solution did not produce any lasting effects.

### *In vitro protocol*

Dose–response curves were established for up to four agonist doses of each drug. No more than four different drugs were tested on one preparation. In some preparations, the maximum agonist dose was repeated following the addition of a selective antagonist to the Ringer's solution. The peak response was used to

express the percentage change in gill resistance, and  $pD_2$  values ( $pD_2 = -\log ED_{50}$ ) were calculated.

#### *Data acquisition, presentation and statistics*

In addition to the polygraph tracings, all data were fed into an IBM PPC computer, allowing continuous sampling at  $10 \text{ samples s}^{-1}$  and on-line mean value calculation for 1-min periods. Data from individual *in vivo* experiments were superimposed and are presented in graphs as means  $\pm$  s.e.m. at 1- (agonists) or 2- (hypoxia) min intervals (Fritsche and Nilsson, 1989).

Stroke volume was calculated from  $\dot{Q}$  divided by  $f_H$ , and vascular resistance as pressure drop over the branchial ( $R_G$ ) or systemic ( $R_s$ ) vascular bed divided by cardiac output ( $\dot{Q}$ ). In either case, calculations were performed for each animal, and means then calculated from the individual values.

Means  $\pm$  s.e.m. are presented ( $N$ =number of animals). The non-parametric Wilcoxon's sign rank test for paired samples was used (two-tailed) to determine the statistical significance of observed effects of drug injections or hypoxic exposure *in vivo*. Comparisons were made between the values before injection of the agonist and the values 5 min after the injection, at which time the effect (if any) was stabilizing. The development of effects of hypoxia was slower, and the statistical evaluations were made after 15 min of hypoxia and again after 20 min of recovery from the hypoxia. The level of significance was set to  $P \leq 0.05$ .

### Results

The control parameters are presented in Table 1 for the seven hagfish used in the *in vivo* experiments. The pulsatile characteristics of the cardiovascular variables are presented in Fig. 1. Under control conditions the mean  $f_H$  was  $22.3 \text{ beats min}^{-1}$ . Slow oscillations of  $1\text{--}2 \text{ beats min}^{-1}$  around the mean resting value were common. The absence of beat-to-beat oscillations in  $f_H$  is consistent with the aneural control of the heart.

Table 1. *A summary of simultaneously recorded and calculated cardiovascular parameters from hagfish Myxine glutinosa*

|                                                                |                 |
|----------------------------------------------------------------|-----------------|
| $P_{VA}$ (kPa)                                                 | $1.04 \pm 0.10$ |
| $P_{DA}$ (kPa)                                                 | $0.77 \pm 0.12$ |
| $f_H$ (beats $\text{min}^{-1}$ )                               | $22.3 \pm 1.0$  |
| $\dot{Q}$ ( $\text{ml min}^{-1} \text{ kg}^{-1}$ )             | $8.7 \pm 1.7$   |
| $V_s$ ( $\text{ml beat}^{-1} \text{ kg}^{-1}$ )                | $0.41 \pm 0.08$ |
| $R_G$ ( $\text{Pa} \cdot \text{min} \cdot \text{kg ml}^{-1}$ ) | $49 \pm 22$     |
| $R_s$ ( $\text{Pa} \cdot \text{min} \cdot \text{kg ml}^{-1}$ ) | $113 \pm 27$    |

The figures show ventral aortic pressure ( $P_{VA}$ ), dorsal aortic pressure ( $P_{DA}$ ), heart rate ( $f_H$ ), cardiac output ( $\dot{Q}$ ), stroke volume ( $V_s$ ), branchial vascular resistance ( $R_G$ ) and systemic vascular resistance ( $R_s$ ).

The values are presented as means  $\pm$  s.e.m.,  $N=7$ .

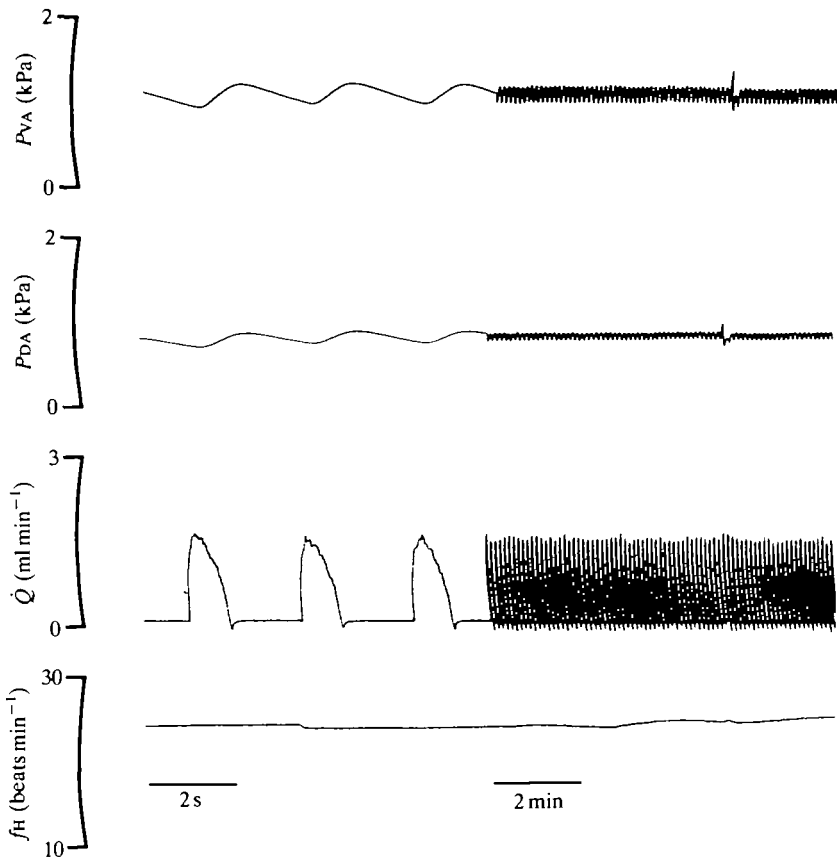

Fig. 1. Simultaneously recorded ventral aortic pressure ( $P_{VA}$ ), dorsal aortic pressure ( $P_{DA}$ ), phasic ventral aortic blood flow ( $\dot{Q}$ ) and heart rate ( $f_H$ ) in untreated *Myxine*. Note the zero flow during the diastolic phase of the cardiac cycle, and the notches in both  $P_{VA}$  and  $P_{DA}$  traces during a cough (right part of figure).

The mean  $\dot{Q}$  was  $8.7 \text{ ml min}^{-1} \text{ kg}^{-1}$ , and there was a significant period of zero flow during diastole (Fig. 1).

Gill resistance accounted for 30% of the total vascular resistance. Coughing was indicated by a peak in the blood pressure recording (Figs 1,2) and corroborated by visual observations (Steffensen *et al.* 1984). The pressure peak in the ventral aortic recording could be attributed to an artefact of cannula movement because of the proximity of the cannula to the gill aperture. This reasoning does not hold for the corresponding peak in the  $P_{DA}$  trace (Figs 1,2), since this cannula was at the tail of the animal. Thus, it seems likely that coughing can significantly affect systemic blood pressures.

#### Control injections

A sham injection of 0.3 ml of 3.0% NaCl produced no marked changes in  $f_H$  or

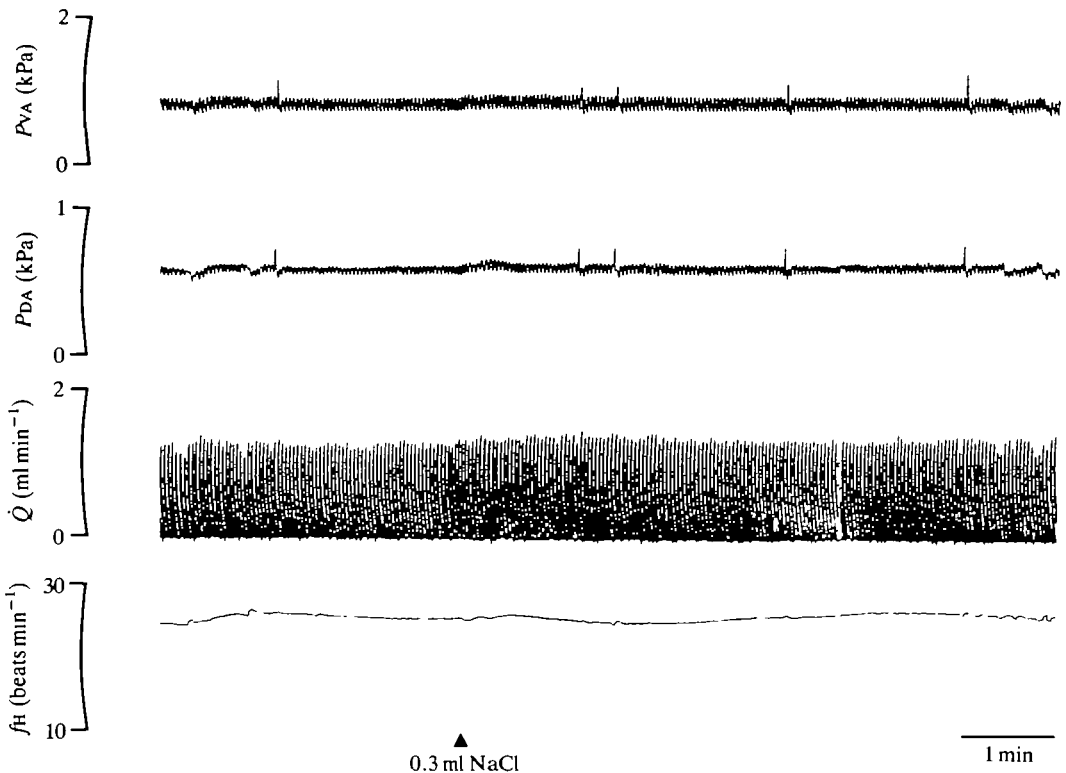

Fig. 2. Simultaneously recorded ventral aortic pressure ( $P_{VA}$ ), dorsal aortic pressure ( $P_{DA}$ ), phasic ventral aortic blood flow ( $\dot{Q}$ ) and heart rate ( $f_H$ ) in *Myxine* before and after injection of 0.3 ml of 3% NaCl. Note absence of visible effects on the recorded parameters.

$\dot{Q}$  (Fig. 2). Therefore, we are confident that the cardiovascular effects observed are due directly to the drugs injected.

#### Adrenaline

Both doses of adrenaline produced an immediate increase in  $V_s$  and  $f_H$ , which elevated  $\dot{Q}$  significantly (Fig. 3). The maximum value of  $\dot{Q}$  approached  $25 \text{ ml min}^{-1} \text{ kg}^{-1}$ , and was reached after 3–4 min. Recovery was not complete even 15 min after the injection. With the high dose of adrenaline ( $100 \text{ nmol kg}^{-1}$ ),  $f_H$  increased by approximately 20% (20 to 24  $\text{beats min}^{-1}$ ), and  $V_s$  increased by 30% ( $0.7$  to  $1.0 \text{ ml kg}^{-1}$ ). The changes in  $V_s$ ,  $f_H$  and  $\dot{Q}$  were quantitatively the same for both doses injected.

No significant effect on  $R_G$  was observed with adrenaline, but a significant decrease in  $R_s$  occurred, at least with the low dose of adrenaline ( $10 \text{ nmol kg}^{-1}$ ). The decrease in vascular resistance was proportionately less than the increase in  $\dot{Q}$  and therefore there was a significant increase in both  $P_{VA}$  and  $P_{DA}$ .



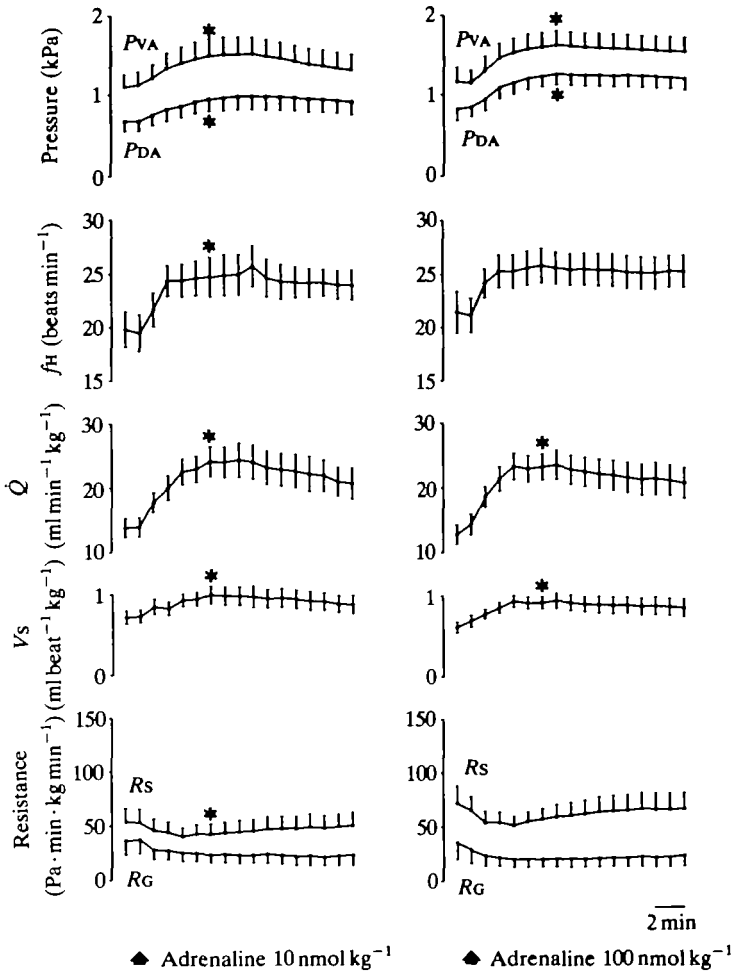

Fig. 3. Mean values for the simultaneously recorded and calculated parameters [ventral and dorsal aortic blood pressure ( $P_{VA}$ ,  $P_{DA}$ ), ventral aortic blood flow ( $\dot{Q}$ ), heart rate ( $f_H$ ), stroke volume ( $V_s$ ) and systemic and branchial vascular resistance ( $R_s$ ,  $R_G$ )] in *Myxine* prior to and after a bolus injection of adrenaline. Left part of figure: 10 nmol kg<sup>-1</sup> adrenaline injected into the caudal vein in 0.1 ml kg<sup>-1</sup> fish and then flushed with 0.2 ml of NaCl. Right part of figure: same procedure but with 100 nmol kg<sup>-1</sup> adrenaline instead. Means  $\pm$  s.e.m.,  $N=7$ . Statistical analysis (value before injection vs value 5 min after injection) shows significant effects ( $P < 0.05$ ) indicated by asterisks.

#### Acetylcholine

The low dose of acetylcholine (10 nmol kg<sup>-1</sup>) produced a modest decrease in  $V_s$ , and a small increase in  $\dot{Q}$ , which must be explained in terms of an increase in  $f_H$  (although no statistically significant change could be demonstrated 5 min after the acetylcholine injection) (Fig. 4). There were also minor increases of  $P_{VA}$  and  $P_{DA}$  (Fig. 4). The high dose of acetylcholine (100 nmol kg<sup>-1</sup>) produced a pronounced

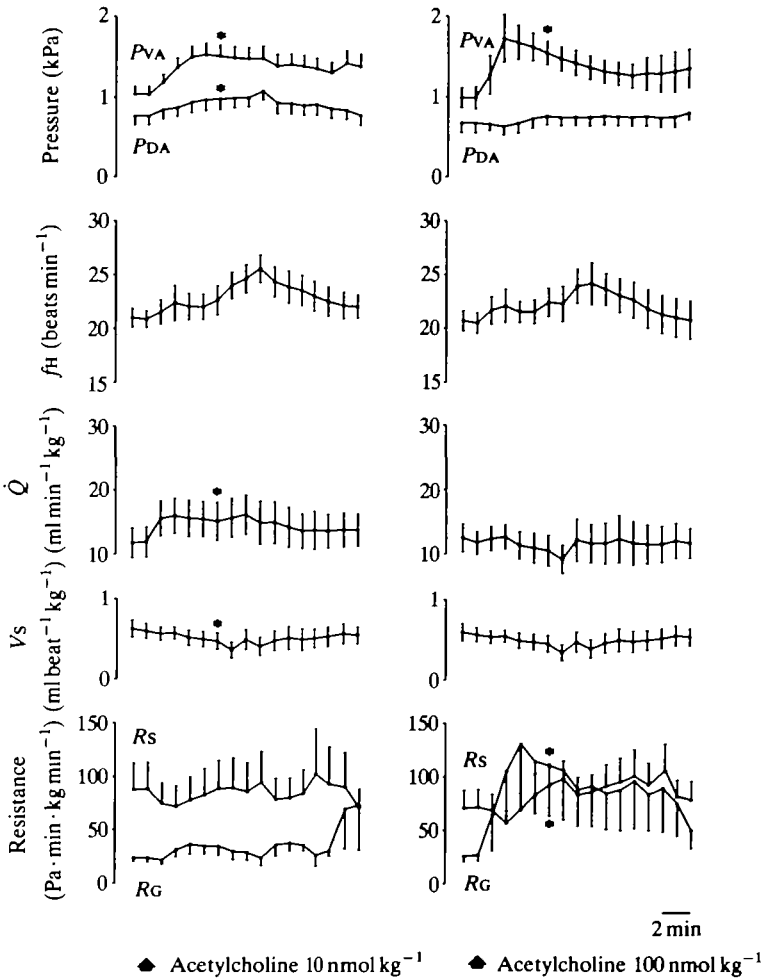

Fig. 4. Mean values for the simultaneously recorded and calculated parameters prior to and after a bolus injection of acetylcholine. Left part of figure: 10 nmol kg<sup>-1</sup> acetylcholine injected into the caudal vein in 0.1 ml kg<sup>-1</sup> fish and then flushed with 0.2 ml of NaCl. Right part of figure: same procedure but with 100 nmol kg<sup>-1</sup> acetylcholine instead. Means  $\pm$  S.E.M.,  $N=7$ . Statistical analysis (value before injection vs value 5 min after injection) shows significant effects indicated by asterisks.

increase in  $R_G$  and  $P_{VA}$ , while the change in  $R_S$  was smaller and  $P_{DA}$  remained unchanged. As  $P_{VA}$  began to decrease from the peak value of 1.5 kPa there was a noticeable increase in  $f_H$ .

#### Adenosine

The dose of 1  $\mu$ mol kg<sup>-1</sup> adenosine affected  $V_S$  and  $\dot{Q}$ , while  $f_H$  remained unchanged (Fig. 5). There was an immediate and marked systemic vasodilatation, with accompanying hypotension;  $R_G$  was not affected.

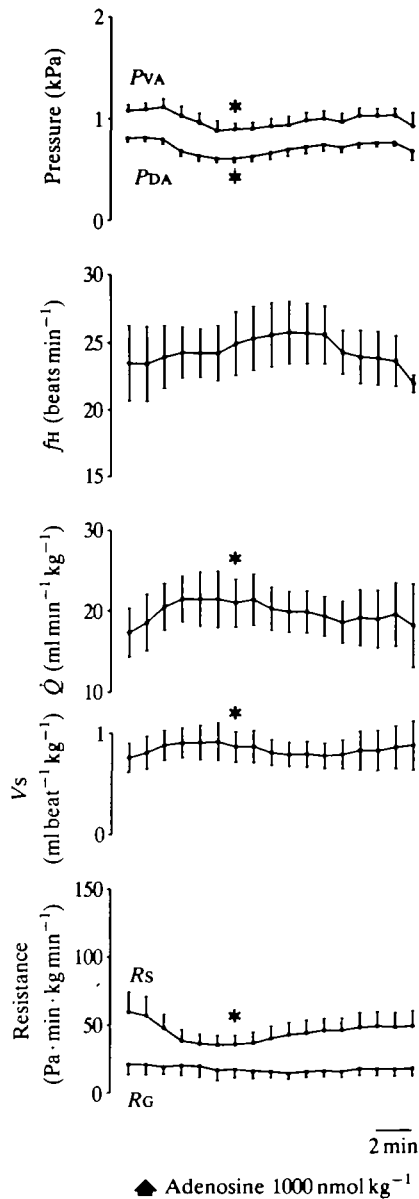

Fig. 5. Mean values for the simultaneously recorded and calculated parameters prior to and after a bolus injection of 1000 nmol kg<sup>-1</sup> adenosine into the caudal vein in 0.1 ml kg<sup>-1</sup> fish and then flushed with 0.2 ml of NaCl. Means  $\pm$  S.E.M.,  $N=7$ . Statistical analysis (value before injection vs value 5 min after injection) shows significant effects indicated by asterisks.

### Hypoxia

The hypoxic tolerance of the *Myxine* heart is well known, but before the present investigation it was not clear what level of pumping ability was retained during

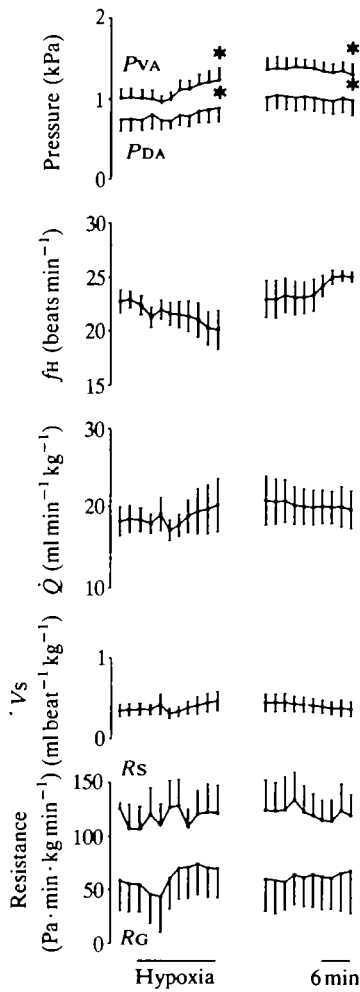

Fig. 6. Mean values for the simultaneously recorded and calculated parameters prior to, during and after a period of hypoxia ( $P_{wO_2}=1.5\text{--}2.2\text{ kPa}$ ). Statistical analysis (value pre-hypoxia vs value at 15 min of hypoxia; means  $\pm$  s.e.m.,  $N=7$  and value pre-hypoxia vs 20 min post-hypoxia; means  $\pm$  s.e.m.,  $N=5$ ) shows significant effects indicated by asterisks.

hypoxia. Preliminary experiments exposing two hagfish to a water  $P_{O_2}$  of 4.0 kPa had no effect on cardiovascular variables. The present level of hypoxic exposure (1.5–2.2 kPa for 15–35 min) is considered severe by teleost standards and the fact that the hagfish were able to maintain  $\dot{Q}$  at resting levels is quite remarkable (Fig. 6).

There were statistically significant increases in  $P_{VA}$  and  $P_{DA}$  both during the hypoxic exposure and for as long as 20 min into the recovery from hypoxia (Fig. 6).

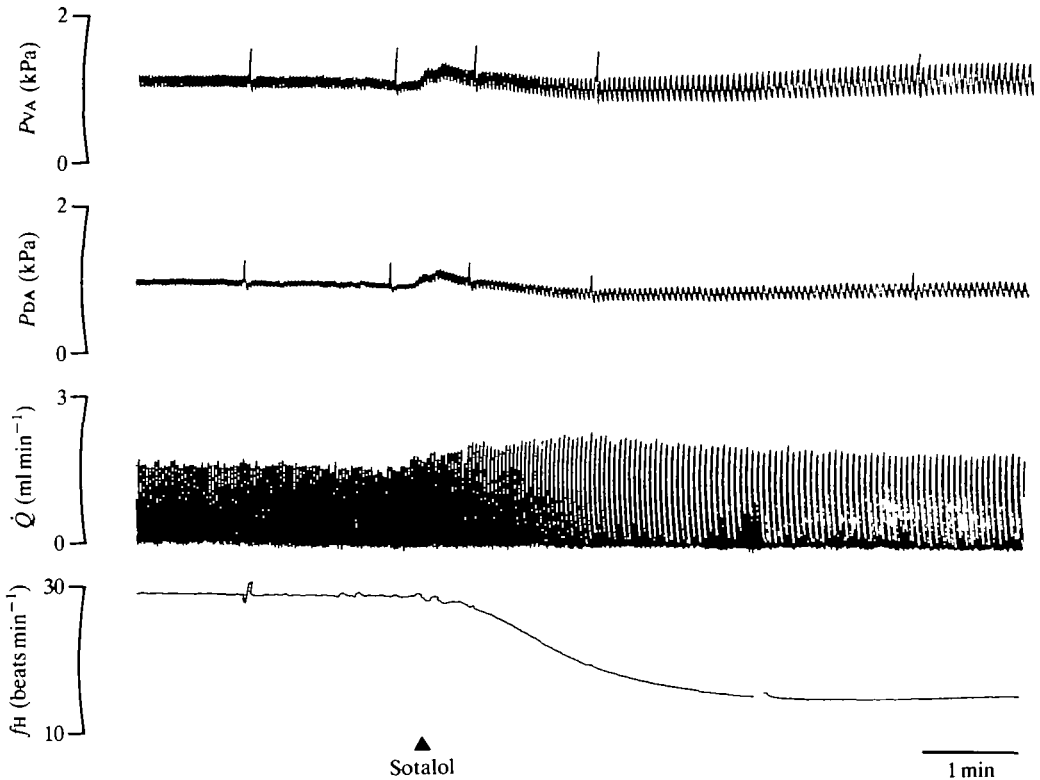

Fig. 7. Simultaneously recorded ventral aortic pressure ( $P_{VA}$ ), dorsal aortic pressure ( $P_{DA}$ ), phasic ventral aortic blood flow ( $\dot{Q}$ ) and heart rate ( $f_H$ ) prior to and after an intravenous injection of  $1.35 \text{ mg kg}^{-1}$  of the  $\beta$ -adrenoreceptor antagonist sotalol. Note the rapid and massive fall in  $f_H$ .

#### *Sotalol and atropine*

Injection of sotalol produced an immediate and pronounced decrease in  $f_H$  (Fig. 7), followed by a progressive decline in  $V_s$ .

Atropine had no significant effects on any of the measured parameters.

#### *Gill perfusions*

Dose-dependent vasoconstriction of perfused gills was observed with acetylcholine ( $pD_2=6.64\pm 0.35$ ;  $N=4$ ) and adrenaline ( $pD_2=7.06\pm 0.30$ ;  $N=6$ ). Vasodilatation was observed with the  $\beta$ -adrenoreceptor agonist isoprenaline ( $pD_2=5.12\pm 0.26$ ;  $N=4$ ), adenosine ( $pD_2=5.91\pm 0.29$ ;  $N=7$ ) and noradrenaline ( $pD_2=5.92\pm 0.31$ ;  $N=5$ ) (Fig. 8).

#### **Discussion**

The present investigation is the first to measure  $\dot{Q}$  along with other key cardiovascular variables in *Myxine*. The study demonstrates a period of zero flow

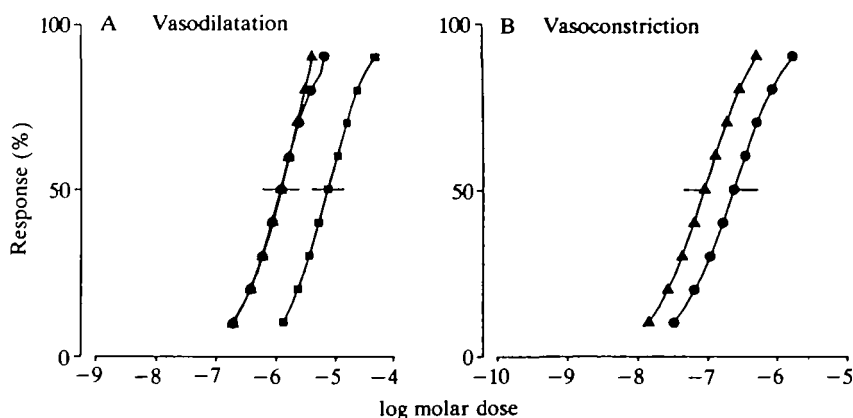

Fig. 8. Dose-response curves showing effects of bolus injections of increasing doses of agonists on the perfusion pressure in the perfused head preparations. (A) Vasodilatation produced by isoprenaline ( $\blacktriangle$ ,  $N=4$ ), noradrenaline ( $\bullet$ ,  $N=5$ ) and adenosine ( $\blacksquare$ ,  $N=7$ ). (B) Vasoconstriction produced by acetylcholine ( $\blacktriangle$ ,  $N=4$ ) and adrenaline ( $\bullet$ ,  $N=7$ ). Means  $\pm$  s.e.m. (for the  $pD_2$  values).

during diastole, which suggests that the windkessel properties of the hagfish ventral aorta and bulbus cordis are limited. This conclusion was supported by visual observations of the relatively thin ventral aorta. Furthermore, studies of the distribution of elastin have shown that elastin is absent in cyclostomes (Sage and Gray, 1979, 1980).

The resting  $\dot{Q}$  value of close to  $9 \text{ ml min}^{-1} \text{ kg}^{-1}$  is somewhat lower than resting  $\dot{Q}$  in elasmobranchs and teleosts that do not have a very active lifestyle. For example, the following  $\dot{Q}$  values are reported for water temperatures at or near  $10^\circ\text{C}$ : Atlantic cod (*Gadus morhua*)  $17.3 \text{ ml min}^{-1} \text{ kg}^{-1}$  (Axelsson and Nilsson, 1986); lingcod (*Ophiodon elongatus*)  $11.2 \text{ ml min}^{-1} \text{ kg}^{-1}$  (Farrell, 1982); sea raven (*Hemitripterus americanus*)  $14.6 \text{ ml min}^{-1} \text{ kg}^{-1}$  (Farrell, 1986); long nose skate (*Raja rhina*)  $21.1 \text{ ml min}^{-1} \text{ kg}^{-1}$  (Satchell *et al.* 1970).

In contrast, *Myxine* can increase  $\dot{Q}$  substantially. The peak  $\dot{Q}$  of  $24 \text{ ml min}^{-1} \text{ kg}^{-1}$ , which was recorded after an adrenaline injection and may not be the maximum  $\dot{Q}$  possible, is impressive compared with  $\dot{Q}$  values reported for elasmobranchs and teleosts during brief exercise (long nose skate  $23.3 \text{ ml min}^{-1} \text{ kg}^{-1}$ , Satchell *et al.* 1970; Atlantic cod  $25.4 \text{ ml min}^{-1} \text{ kg}^{-1}$ , Axelsson and Nilsson, 1986; sea raven  $30.9 \text{ ml min}^{-1} \text{ kg}^{-1}$ , Axelsson *et al.* 1989b). Studies with isolated perfused hearts indicate that a  $\dot{Q}$  of  $22 \text{ ml min}^{-1} \text{ kg}^{-1}$  is possible in the larger New Zealand hagfish, *Eptatretus* (Forster, 1989). Thus, even though hagfish have a non-innervated heart, their ability to pump relatively large volumes, and indeed vary  $V_s$  significantly, is not apparently restricted by the absence of a cardiac innervation. One can presume that this is appropriate for a fish with a large blood volume.

The present study provided quantitative information on some of the mechanisms which influence cardiac pumping in *Myxine*. Previous studies have focused on

the regulation of  $f_H$  and have stressed the importance of the pressure-sensitive pacemaker (Jensen, 1961; Chapman *et al.* 1963; Johansen, 1963). Interestingly, in hagfish not otherwise used for the present analysis, larger injections of saline (0.6–1.0 ml) produced increases in  $V_s$  and  $f_H$ , confirming early reports about the sensitivity of  $V_s$  and  $f_H$  to venous filling pressure. An interesting observation was that apparently dying hagfish typically had a very low  $V_s$  and blood had pooled in their subcutaneous sinuses. Infusion of saline immediately restored  $\dot{Q}$ . Since loss of blood volume through bleeding was not apparent, it seems that the inability to maintain venous return may contribute to the death spiral in the hagfish.

Under both aerobic conditions and severe hypoxia,  $f_H$  was typically about 22 beats  $\text{min}^{-1}$ . The maximum  $f_H$  we observed in our animals was 26 beats  $\text{min}^{-1}$ . Thus, increases in  $f_H$  produce at best a 20% increase in  $\dot{Q}$ . If we assume that increased venous return could produce a similar increase in  $f_H$ , then the pressure-sensitive pacemaker could play a modest role in regulating  $\dot{Q}$  under aerobic and hypoxic conditions.

Clearly, the physiological role of the pressure-sensitive pacemaker needs further study. Perhaps, in the absence of a cardiac innervation, the mechanism is important after prolonged periods of anoxia in the reactivation of cardiac activity, when vigorous sinusoidal tail movements, under neural control, increase venous return. Our observation that venous volume loading significantly increased  $f_H$  and  $V_s$  in apparently dying *Myxine* is consistent with this idea.

Jensen (1961, 1965, 1969) suggested that a pressure-sensitive pacemaker was important in the regulation of  $f_H$  in lampreys, elasmobranchs and teleosts. However, there is now some question about the physiological significance of this mechanism in ocean pout, sea raven, Atlantic salmon, rainbow trout, long-finned eel, rough skate and dogfish (Farrell *et al.* 1983, 1986; Farrell, 1984; P. S. Davie, A. P. Farrell and C. Franklin, unpublished observations): perfused hearts performing a physiological work load under aerobic and hypoxic conditions do not show major changes in  $f_H$  in response to filling pressure, although filling pressure markedly affects  $V_s$ . The only situation in which increases in  $f_H$  are observed in response to increases in filling pressure is when the perfused heart shows atrio-ventricular desynchrony and beats with a ventricular rhythm. The physiological significance of such a mechanism is not immediately obvious. Clearly, the pressure-sensitive pacemaker has a physiological significance in hagfish. However, even though the mechanism is retained in other aquatic vertebrates, its importance for controlling  $f_H$  has been superseded by other mechanisms.

Previous studies provide equivocal evidence for catecholamine involvement in the regulation of  $f_H$  in hagfish. The studies of Fänge and Östlund (1954) demonstrate that the insensitivity of the hagfish heart to catecholamine treatment was altered by dihydroergotamine, such that positive chronotropic and inotropic responses were elicited. It was suggested that the high catecholamine content of the heart might provide an endogenous cardiac tonus, against which further adrenergic stimulation could not be detected. Indeed, Bloom *et al.* (1961) found that reserpine treatment impaired cardiac performance and reduced the catechol-

amine content of the heart, an observation that is consistent with the idea that the granulated catecholamine-storing cells in the hagfish heart are related to chromaffin cells.

Our observations on intact *Myxine* support these ideas. Adrenaline injections into the caudal vein produced immediate increases in  $f_H$  and  $V_s$ , which we conclude were a result of direct adrenergic stimulation of the heart. Perhaps more significant was the clear evidence for a tonic  $\beta$ -adrenergic stimulation of  $f_H$ , as indicated by the pronounced decrease in  $f_H$  with sotalol treatment. Whether this adrenergic tonus to the *Myxine* heart is endogenous was not established and we are still left with the question: what is the selective advantage of catecholamine granules in the hagfish heart? The answer may, again, relate to recovery from anoxic metabolic depression. Interestingly, the only other vertebrate group with significant cardiac storage of catecholamines is the lungfish (Dipnoi), which also experience metabolic depression (although of another kind) during torpor (Abrahamsson *et al.* 1979; Scheuermann, 1979; Scheuermann *et al.* 1981; Nilsson, 1983). Perhaps release of endogenous catecholamines from the heart of hagfish and lungfish is pressure-sensitive.

We were unable to show any immediate and direct effects of acetylcholine, hypoxia or adenosine on  $f_H$ . The insensitivity to acetylcholine is consistent with earlier work on hagfish (see Johansen, 1963, for references). Hypoxia has no effect on the intrinsic  $f_H$  of perfused hearts from sea raven, rough skate and dogfish (Farrell *et al.* 1985; P. S. Davies and A. P. Farrell, unpublished observations).

Regulation of  $V_s$  in hagfish appeared at least as important (adrenergic stimulation, Fig. 3; recovery from hypoxia, Fig. 6) as  $f_H$  in modulating  $\dot{Q}$ . Also, increases in  $V_s$  occurred either when  $f_H$  decreased abruptly following sotalol treatment or when  $f_H$  increased following large volume injection. *In vitro* the hagfish heart responds to increased filling pressure by increasing  $V_s$  in accordance with the Frank–Starling mechanism (Chapman *et al.* 1963; Forster, 1989). Thus, it seems likely that the *in vivo* modulation of  $V_s$  observed here is, in part, explained by changes in filling pressure. Adrenergic stimulation increases the sensitivity of the perfused trout heart to filling pressure, so that a greater  $V_s$  is possible at the same filling pressure (Farrell *et al.* 1986). In the present study, adrenaline injection produced an increase in  $V_s$  (Fig. 3). A potential role for adrenergic modulation of the sensitivity of the *Myxine* heart to filling pressure was also apparent but needs to be quantified.

$V_s$  in the hagfish also appeared to be sensitive to afterload pressure.  $V_s$  decreased 5–8 min after acetylcholine injection and, because of this time lag, the reversal in  $V_s$  is unlikely to be a direct cardiac effect of acetylcholine. Instead, it appears likely that the heart could not continue to pump against this elevated outflow resistance. This conclusion is supported by observations in other hagfish, where even higher doses of acetylcholine produced a complete cessation of ventral aortic flow. The maximum  $P_{VA}$  observed in these hagfish was 1.6 kPa.

Typically, fish and mammalian hearts are capable of homeometric regulation; that is,  $V_s$  is relatively independent of physiological afterload pressures. However,



as suprphysiological pressures are imposed on the heart, power output is initially constant, with a trade-off between pressure and flow development, and then declines with disproportionate decreases in flow. It is in the area of pressure development that the pumping ability of the *Myxine* heart undoubtedly differs most drastically from the situation in teleost fishes. Normal ventral aortic pressures for *Myxine* are one-third to one-quarter of those reported for teleost fish. A 50% increase is possible without compromising  $\dot{Q}$  in *Myxine* (Fig. 4) and teleosts (Farrell, 1984). Nevertheless, comparisons of myocardial power output reveal the low pumping capacity of the *Myxine* heart. The resting performance presented in Table 1 approximates to a power output of  $0.154 \text{ mW g}^{-1}$  ventricle mass, assuming a ventricle mass of  $1 \text{ g kg}^{-1}$  body mass and an ambient venous filling pressure. The peak response to adrenaline approximates to a power output of  $0.62 \text{ mW g}^{-1}$  ventricle mass and the peak response to acetylcholine approximates to  $0.40 \text{ mW g}^{-1}$  ventricle mass. These power output levels are about an order of magnitude lower than the maximum power output levels for perfused hearts from sea raven ( $4 \text{ mW g}^{-1}$ ; Farrell *et al.* 1985) and trout ( $6 \text{ mW g}^{-1}$ ; Farrell *et al.* 1989). Because the peak power output with adrenaline is greater than with acetylcholine, when  $\dot{Q}$  was clearly compromised, it appears that adrenergic stimulation of the hagfish heart *in vivo* extends the range for homeometric regulation. This conclusion is consistent with the reported inotropic effect of adrenaline on perfused hearts from hagfish (Fänge and Östlund, 1954; Chapman *et al.* 1963) and teleosts (Graham and Farrell, 1989).

The ability of the hagfish heart to maintain resting cardiac performance during severe anoxia is remarkable. The venous  $P_{\text{O}_2}$  during the present hypoxia experiment was not measured but must have been well below the water  $P_{\text{O}_2}$  of 1.5–2.2 kPa. There are at least two reasons for this hypoxic tolerance: the high anaerobic capacity and the low aerobic requirement of the *Myxine* heart. Previous studies have clearly demonstrated that the hagfish heart can tolerate anoxia, but pumping capacity has not been assessed (Hansen and Sidell, 1983). Therefore, the present study is the first to estimate the pumping capacity in terms of power production during severe hypoxia. The aerobic requirement of the heart is low. If we assume a 15% efficiency for mechanical work (Farrell *et al.* 1985), then  $0.05 \mu\text{l O}_2 \text{ s}^{-1} \text{ g}^{-1}$  ventricle mass is required to maintain a power output of  $0.154 \text{ mW g}^{-1}$ . This  $\text{O}_2$  requirement may be somewhat higher if the hagfish heart is less efficient at this low power output and the basal metabolic rate of the heart is a more significant component of the myocardial energy requirement. Using a more conservative estimate of mechanical efficiency (5%), the  $\text{O}_2$  requirement is  $0.15 \mu\text{l O}_2 \text{ s}^{-1} \text{ g}^{-1}$ . These levels of  $\text{O}_2$  consumption require an ATP turnover rate of 12.8–39.4  $\text{nmol ATP s}^{-1} \text{ g}^{-1}$  ventricle mass, depending on the mechanical efficiency of the heart. If the hagfish heart has a maximal anaerobic ATP production rate similar to that in the sea raven ( $20 \text{ nmol ATP s}^{-1} \text{ g}^{-1}$ ; Turner and Driedzic, 1980), it appears that most, if not all, of the ATP requirements of the heart can be met anaerobically. Further studies would be useful to determine exactly how much of the range for cardiac pumping in the hagfish can be fuelled anaerobically.

This work was supported by the Swedish Natural Science Research Council, the Magn Bergvall Foundation and the Lars Hierta Memorial Foundation. We wish to thank the staff of Kristineberg Marine Biological Station for their help and hospitality during the course of this study.

### References

- ABRAHAMSSON, T., HOLMGREN, S., NILSSON, S. AND PETTERSSON, K. (1979). On the chromaffin system of the African lungfish, *Protopterus aethiopicus*. *Acta physiol. scand.* **107**, 135–139.
- AUGUSTINSSON, K. B., FÄNGE, R., JOHNELS, A. AND ÖSTLUND, E. (1956). Histological, physiological and biochemical studies on the heart of two cyclostomes, hagfish (*Myxine*) and lamprey (*Lampetra*). *J. Physiol., Lond.* **131**, 257–276.
- AXELSSON, M., ABE, A. S., BICUDO, J. E. P. W. AND NILSSON, S. (1989a). On the cardiac control in the South American lungfish, *Lepidosiren paradoxa*. *Comp. Biochem. Physiol.* **93A**, 561–565.
- AXELSSON, M., DRIEDZIC, W. R., FARRELL, A. P. AND NILSSON, S. (1989b). Regulation of cardiac output and gut blood flow in the sea raven, *Hemirhamphus americanus*. *Fish Physiol. Biochem.* **6**, 315–326.
- AXELSSON, M. AND NILSSON, S. (1986). Blood pressure control during exercise in the Atlantic cod, *Gadus morhua*. *J. exp. Biol.* **126**, 225–236.
- BLOOM, G., ÖSTLUND, E., EULER, U. S. V., LISHAJKO, F., RITZÉN, M. AND ADAMS-RAY, J. (1961). Studies on catecholamine-containing granules of specific cells in cyclostome hearts. *Acta physiol. scand.* **53** (Suppl. 185), 1–34.
- BLOOM, G., ÖSTLUND, E. AND FÄNGE, R. (1963). Functional aspects of cyclostome hearts in relation to recent structural findings. In *The Biology of Myxine* (ed. A. Brodal and R. Fänge), pp. 317–339. Oslo: Universitetsforlaget.
- CHAPMAN, C. B., JENSEN, D. AND WILDENTHAL, K. (1963). On circulatory control mechanisms in the Pacific hagfish. *Circulation Res.* **12**, 427–440.
- DAVIE, P. S., FORSTER, M. E., DAVISON, B. AND SATCHELL, G. H. (1987). Cardiac function in the New Zealand hagfish, *Epiplatys cirrhatus*. *Physiol. Zool.* **60**, 233–240.
- EULER, U. S. V. AND FÄNGE, R. (1961). Catecholamines in nerves and organs of *Myxine glutinosa*, *Squalus acanthias*, and *Gadus callarias*. *Gen. comp. Endocr.* **1**, 191–194.
- FÄNGE, R., BLOOM, G. AND ÖSTLUND, E. (1963a). The portal vein heart of myxinoids. In *The Biology of Myxine* (ed. A. Brodal and R. Fänge), pp. 340–351. Oslo: Universitetsforlaget.
- FÄNGE, R., JOHNELS, A. G. AND ENGER, P. S. (1963b). The autonomic nervous system. In *The Biology of Myxine* (ed. A. Brodal and R. Fänge), pp. 124–136. Oslo: Universitetsforlaget.
- FÄNGE, R. AND ÖSTLUND, E. (1954). The effects of adrenaline, noradrenaline, tyramine and other drugs on the isolated heart from marine vertebrates and a cephalopod (*Eledone cirrosa*). *Acta Zool., Stockholm* **35**, 289–305.
- FARRELL, A. P. (1982). Cardiovascular changes in the unanaesthetised lingcod (*Ophiodon elongatus*) during short-term progressive hypoxia and spontaneous activity. *Can. J. Zool.* **60**, 933–941.
- FARRELL, A. P. (1984). A review of cardiac performance in the teleost heart: intrinsic and humoral regulation. *Can. J. Zool.* **62**, 523–536.
- FARRELL, A. P. (1986). Cardiovascular responses in the sea raven, *Hemirhamphus americanus*, elicited by vascular compression. *J. exp. Biol.* **122**, 65–80.
- FARRELL, A. P., MACLEOD, K. R. AND CHANCEY, B. (1986). Intrinsic mechanical properties of the perfused rainbow trout heart and the effects of catecholamines and extracellular calcium under control and acidotic conditions. *J. exp. Biol.* **125**, 319–345.
- FARRELL, A. P., MACLEOD, K. R., DRIEDZIC, W. R. AND WOOD, S. (1983). Cardiac performance in the *in situ* perfused fish heart during extracellular acidosis: interactive effects of adrenaline. *J. exp. Biol.* **107**, 415–429.
- FARRELL, A. P., SMALL, S. AND GRAHAM, M. S. (1989). Effect of heart rate and hypoxia on the performance of a perfused trout heart. *Can. J. Zool.* **67**, 274–280.
- FARRELL, A. P., WOOD, S., HART, T. AND DRIEDZIC, W. R. (1985). Myocardial oxygen

- consumption in the sea raven, *Hemirhamphus americanus*: the effects of volume loading, pressure loading and progressive hypoxia. *J. exp. Biol.* **117**, 237–250.
- FORSTER, M. E. (1989). Performance of the heart of the hagfish, *Eptatretus cirrhatu*s. *Fish Physiol. Biochem.* (in press).
- FORSTER, M. E., DAVIE, P. S., DAVISON, W., SATCHELL, G. H. AND WELLS, R. M. G. (1988). Blood pressures and heart rates in swimming hagfish. *Comp. Biochem. Physiol.* **89A**, 247–250.
- FOSS, G. (1963). *Myxine* in its natural surroundings. In *The Biology of Myxine* (ed. A. Brodal and R. Fänge), pp. 42–45. Oslo: Universitetsforlaget.
- FRICTHE, R. AND NILSSON, S. (1989). Cardiovascular responses to hypoxia in the Atlantic cod, *Gadus morhua*. *Expl Biol.* **48**, 153–160.
- GRAHAM, M. S. AND FARRELL, A. P. (1989). The effect of temperature acclimation and adrenaline on the performance of a perfused trout heart. *Physiol. Zool.* **62**, 38–61.
- HANSEN, C. A. AND SIDELL, B. D. (1983). Atlantic hagfish cardiac muscle: metabolic basis of tolerance to anoxia. *Am. J. Physiol.* **244**, R356–R362.
- HOLMGREN, S. AND FÄNGE, R. (1981). Effects of cholinergic drugs on the intestine and gallbladder of the hagfish, *Myxine glutinosa* L., with a report on the inconsistent effects of catecholamines. *Mar. Biol. Lett.* **2**, 265–277.
- JENSEN, D. (1961). Cardioregulation in an aneural heart. *Comp. Biochem. Physiol.* **2**, 181–201.
- JENSEN, D. (1965). The aneural heart of the hagfish. *Ann. N.Y. Acad. Sci.* **127**, 443–458.
- JENSEN, D. (1969). Intrinsic cardiac rate regulation in the sea lamprey (*Petromyzon marinus*) and rainbow trout (*Salmo gairdneri*). *Comp. Biochem. Physiol.* **30**, 685–690.
- JOHANSEN, K. (1963). The cardiovascular system of *Myxine glutinosa* L. In *The Biology of Myxine* (ed. A. Brodal and R. Fänge), pp. 289–316. Oslo: Universitetsforlaget.
- JOHANSEN, K. AND STRAHAN, R. (1963). The respiratory system of *Myxine glutinosa* L. In *The Biology of Myxine* (ed. A. Brodal and R. Fänge), pp. 352–371. Oslo: Universitetsforlaget.
- LAURENT, P., HOLMGREN, S. AND NILSSON, S. (1983). Nervous and humoral control of the fish heart: Structure and function. *Comp. Biochem. Physiol.* **76A**, 524–542.
- LEKNES, I. L. (1980). Ultrastructure of atrial endocardium and myocardium in three species of Gadidae (Teleostei). *Cell Tissue Res.* **210**, 1–10.
- NILSSON, S. (1983). *Autonomic Nerve Function in the Vertebrates*. Berlin, Heidelberg, New York: Springer-Verlag. 253pp.
- ÖSTLUND, E. (1954). The distribution of catecholamines in lower animals and their effect on the heart. *Acta physiol. scand.* **31** (Suppl. 112), 1–67.
- REITE, O. B. (1969). The evolution of vascular smooth muscle responses to histamine and 5-hydroxytryptamine. I. Occurrence of stimulatory actions in fish. *Acta physiol. scand.* **75**, 221–239.
- SÆTERS DAL, T. S., JUSTESEN, N.-P. AND KROHNSTAD, A. W. (1974). Ultrastructure and innervation of the teleostean atrium. *J. molec. cell. Cardiol.* **6**, 415–437.
- SAGE, H. AND GRAY, W. R. (1979). Studies on the evolution of elastin. I. Phylogenetic distribution. *Comp. Biochem. Physiol.* **64B**, 313–327.
- SAGE, H. AND GRAY, W. R. (1980). Studies on the evolution of elastin. II. Histology. *Comp. Biochem. Physiol.* **66B**, 13–22.
- SATCHELL, G. H. (1984). On the caudal heart of *Myxine* (Myxinoidea: Cyclostomata). *Acta Zool., Stockholm* **65**, 125–133.
- SATCHELL, G. H. (1986). Cardiac function in the hagfish, *Myxine* (Myxinoidea: Cyclostomata). *Acta Zool., Stockholm* **67**, 115–122.
- SATCHELL, G. H., HANSON, D. AND JOHANSEN, K. (1970). Differential flow through the afferent branchial arteries of the skate, *Raja rhina*. *J. exp. Biol.* **52**, 721–726.
- SCHUEERMANN, D. W. (1979). Untersuchungen hinsichtlich der Innervation des Sinus venosus und des Aurikels von *Protopterus annectens*. *Acta morph. neerl.-scand.* **17**, 231–232.
- SCHUEERMANN, D. W., STILMAN, C., REINHOLD, C. H. AND DEGROODT-LASSEEL, M. H. A. (1981). Microspectrofluorometric study of monoamines in the auricle of the heart of *Protopterus aethiopicus*. *Cell Tissue Res.* **217**, 443–449.
- SMITH, D. G., NILSSON, S., WAHLQVIST, I. AND ERIKSSON, B.-M. (1985). Nervous control of the blood pressure in the Atlantic cod, *Gadus morhua*. *J. exp. Biol.* **117**, 335–347.

- STEFFENSEN, J. F., JOHANSEN, K., SINDBERG, C. D., SÖRENSEN, J. H. AND MÖLLER, J. L. (1984). Ventilation and oxygen consumption in the hagfish, *Myxine glutinosa*. *J. exp. mar. Biol. Ecol.* **84**, 173–178.
- TURNER, J. D. AND DRIEDZIC, W. R. (1980). Mechanical and metabolic response of the perfused isolated fish heart to anoxia and acidosis. *Can. J. Zool.* **58**, 886–889.
